# Supplementary material for: Directly synthesized nitrogen-doped microporous carbons from polybenzoxazine resins for carbon dioxide capture
Source: Royal Society of Chemistry journal article supplement (doi:10.1039/c7py01026e), 2017-01-01
Supplement: c7py01026e1.pdf [file c7py01026e1.pdf]

## Supporting Information for

# Directly synthesized nitrogen-doped microporous carbons from polybenzoxazine resins for carbon dioxide capture

**Jia-Yu Wu, Mohamed Gamal Mohamed and Shiao-Wei Kuo\***

Department of Materials and Optoelectronic Science, Center for Nanoscience and Nanotechnology,  
National Sun Yat-Sen University, Kaohsiung, 804, Taiwan

\*To whom correspondence should be addressed

FAX: 886-7-5254099; [kuosw@faculty.nsysu.edu.tw](mailto:kuosw@faculty.nsysu.edu.tw)

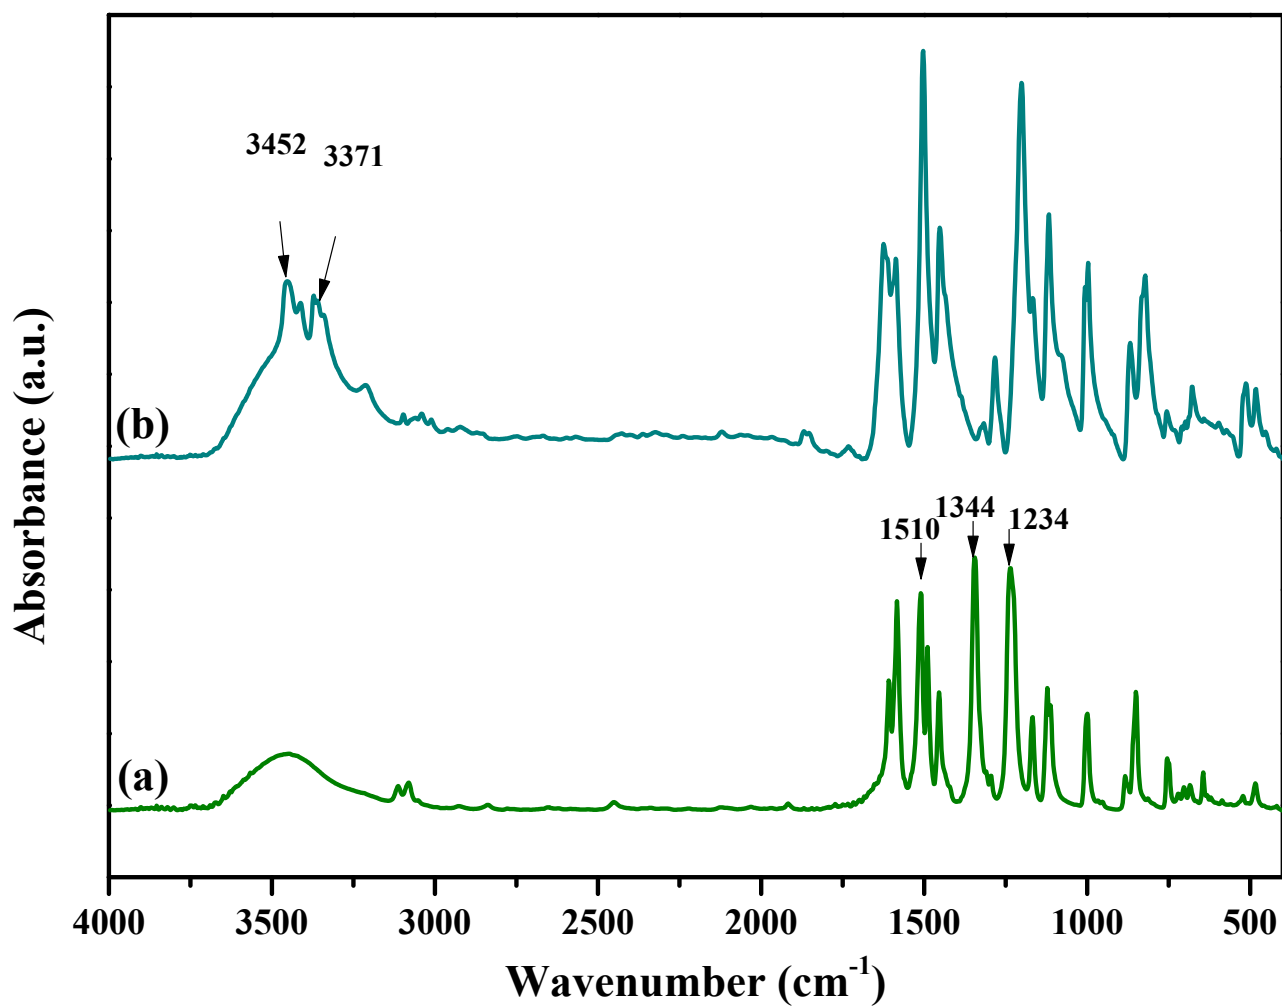

**Figure S1:** FT-IR spectra of (a) 1,3,5-tris(4-nitrophenoxy)benzene, and (b) 1,3,5-tris(4-aminophenoxy)benzene

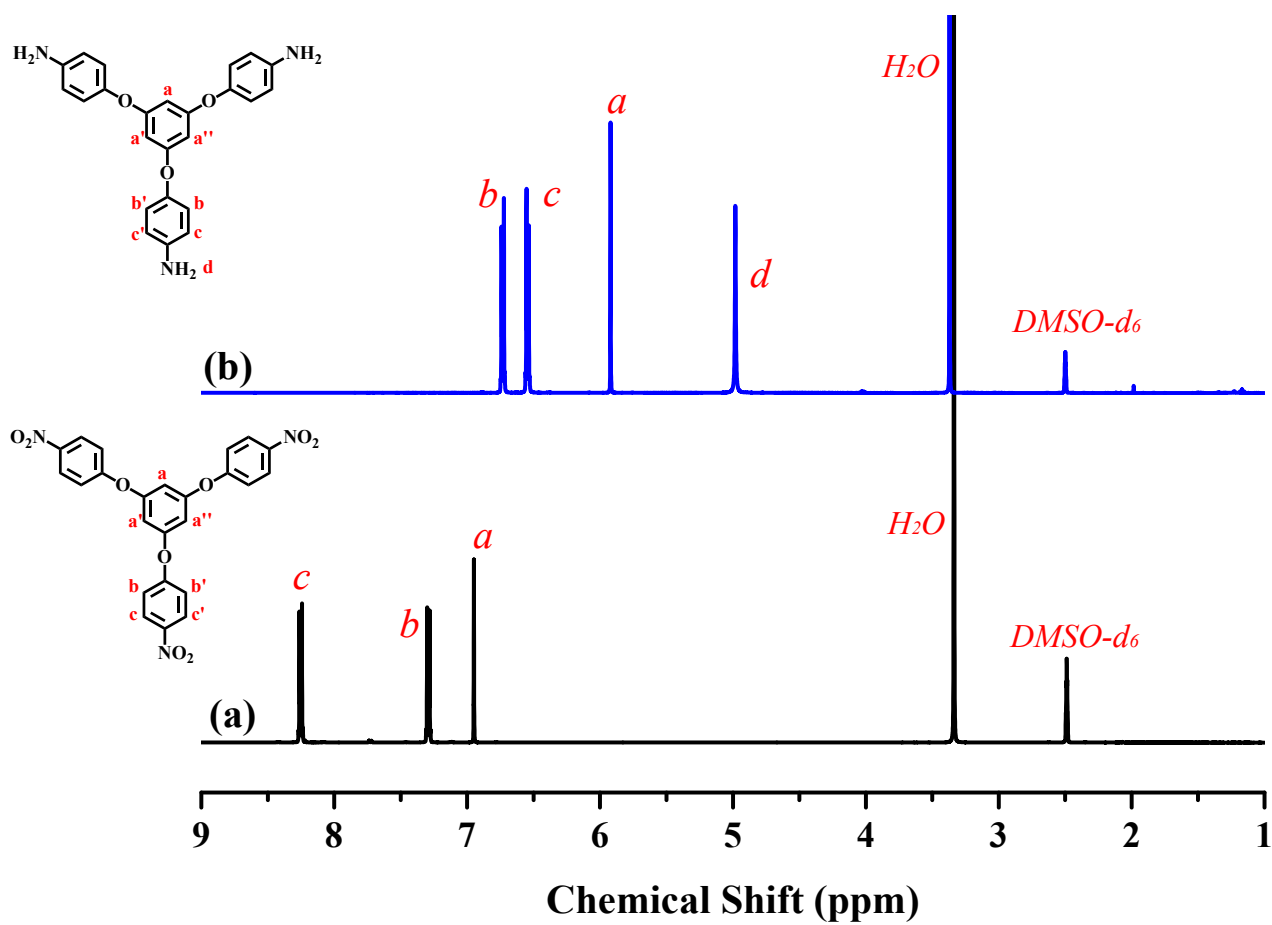

**Figure S2:** <sup>1</sup>H NMR spectra of (a) 1,3,5-tris(4-nitrophenoxy)benzene, and (b) 1,3,5-tris(4-aminophenoxy)benzene
